# Supplementary material for: Synergetic catalytic effect of ionic liquids and ZnO nanoparticles on the selective synthesis of 1,2-disubstituted benzimidazoles using a ball-milling technique
Source: Royal Society of Chemistry journal article supplement (doi:10.1039/c5gc00536a), 2015-01-01

# Supporting Information

## Synergetic catalytic effect of ionic liquids and ZnO nanoparticles on the selective synthesis of 1,2-disubstituted benzimidazoles using a ball-milling technique

Hemant Sharma,<sup>a</sup> Navneet Kaur,<sup>b</sup> Narinder Singh,<sup>a,\*</sup> and Doo Ok Jang<sup>c,\*</sup>

<sup>a</sup>Department of Chemistry, Indian Institute of Technology Ropar, Rupnagar, Punjab 140001, India

<sup>b</sup>Centre for Nanoscience & Nanotechnology, Panjab University, Chandigarh, Panjab 160014, India

<sup>c</sup>Department of Chemistry, Yonsei University, Wonju 220-710, Korea

nsingh@iitrpr.ac.in; dojang@yonsei.ac.kr

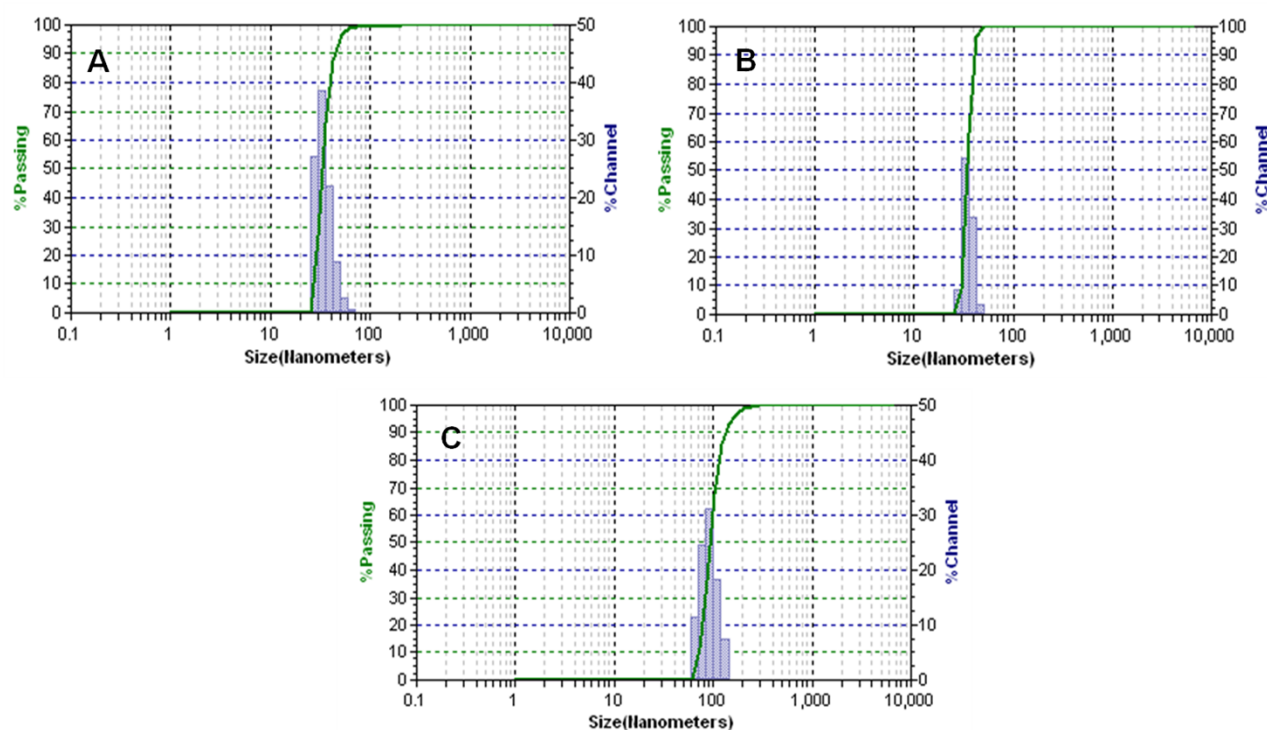

**Figure S1.** DLS studies of catalyst (A) **3** (30 nm), (B) **4** (34 nm) and (C) **5** (90 nm), representing  $d_{50}$  values in parentheses.

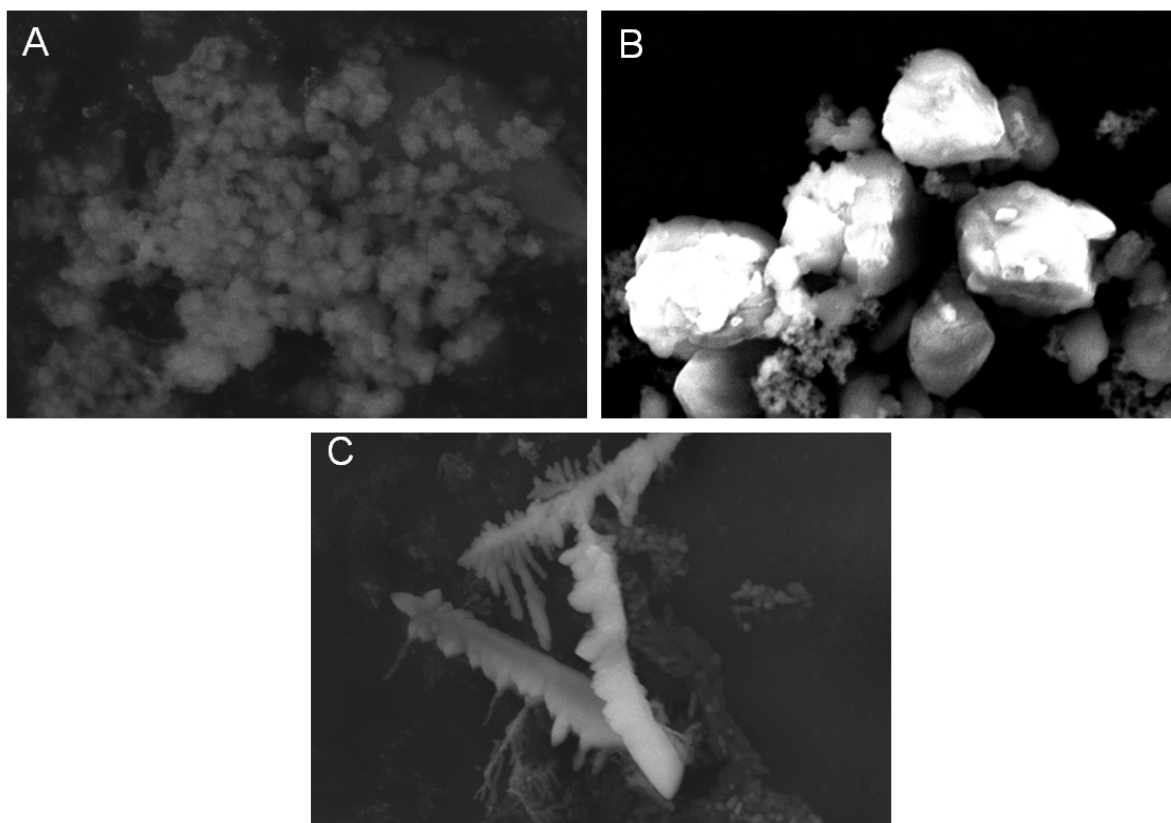

**Figure S2.** SEM images representing the morphology of catalyst (A) **3**, (B) **4** and (C) **5**.

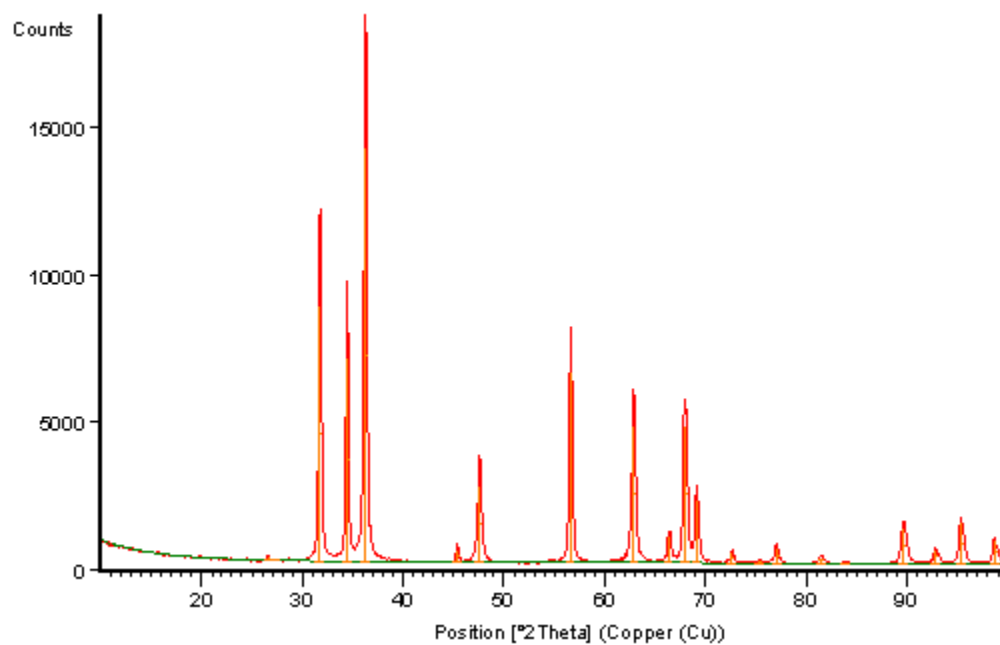

**Figure S3.** XRD pattern of catalyst **5**.

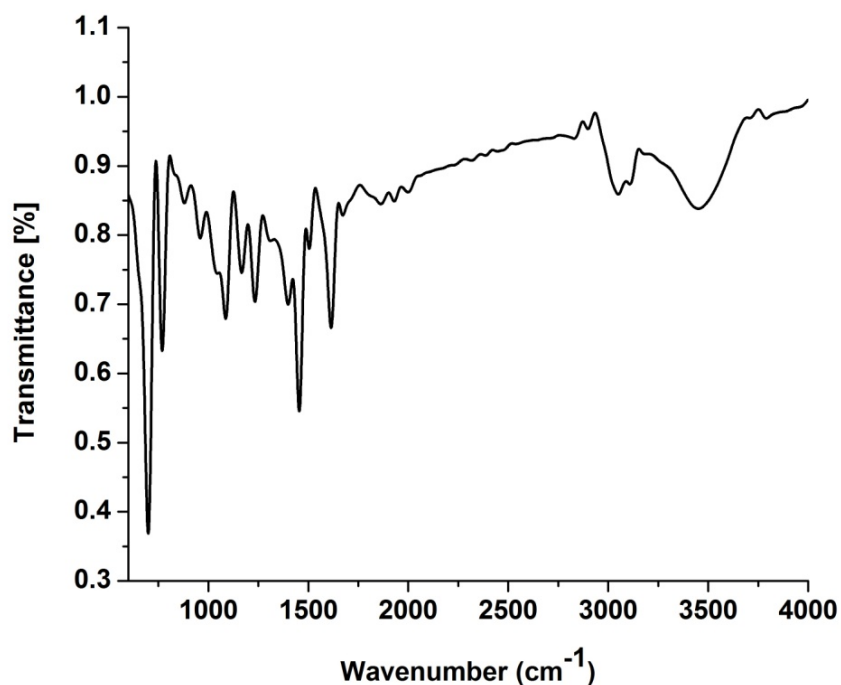

**Figure S4.** FT-IR spectra of catalyst **5**.

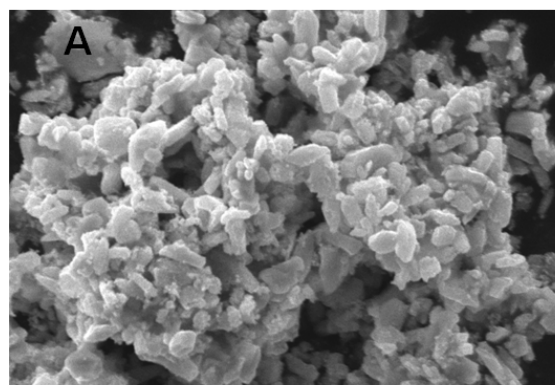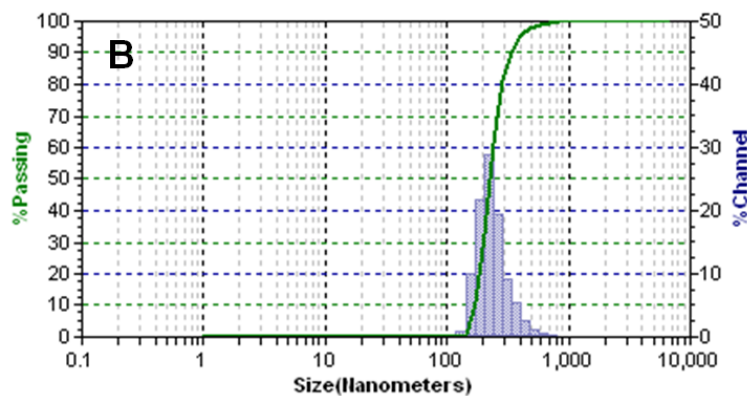

**Figure S5.** (A) SEM image and (B) DLS analysis ( $d_{50} = 260$  nm) of catalyst **5** after the seventh run.

**Table S1.** A relationship between milling time and temperature of milling jar.<sup>a</sup>

| Time (min) | Temp (°C) |
|------------|-----------|
| 0          | 25.2      |
| 4          | 26.6      |
| 8          | 28.2      |
| 15         | 29.1      |
| 22         | 30.0      |
| 30         | 33.4      |
| 40         | 37.2      |
| 60         | 42.8      |

<sup>a</sup>Reaction conditions: *o*-phenylenediamine (9.2 mmol), 4-hydroxy-3-nitrobenzaldehyde (18.5 mmol), catalyst **5** (0.2 mol%), 20 milling balls (5 mm) in a milling jar (80 mL).

**Table S2.** A ratio of ball to powder for each product .

| Product   | Ratio of ball to powder <sup>a,b</sup> |
|-----------|----------------------------------------|
| <b>6</b>  | 20:4                                   |
| <b>8</b>  | 20:3                                   |
| <b>9</b>  | 20:3.2                                 |
| <b>10</b> | 20:3.2                                 |
| <b>11</b> | 20:3.2                                 |
| <b>12</b> | 20:3.5                                 |
| <b>13</b> | 20:3.5                                 |
| <b>14</b> | 20:4                                   |
| <b>15</b> | 20:3                                   |
| <b>16</b> | 20:3                                   |

<sup>a</sup>Weight of milling balls is 20g (1×20). <sup>b</sup>Maximum temperature was 30 °C.

**Table S3.** Eco-scale calculation for the reaction of *o*-phenylenediamine with 2-hydroxybenzaldehyde.<sup>a</sup>

|                                                   | Detail of parameters       | Penalty points <sup>b</sup> |
|---------------------------------------------------|----------------------------|-----------------------------|
| 1. Yield                                          | 94%                        | 3                           |
| 2. Cost of reactants to obtain 10 mmol of product |                            |                             |
|                                                   | <i>o</i> -phenylenediamine | 0                           |
|                                                   | 2-hydroxybenzaldehyde      | 0                           |
|                                                   | ZnO-NPs                    | 0                           |
|                                                   | MeOH                       | 0                           |
| 3. Safety                                         |                            |                             |
|                                                   | <i>o</i> -phenylenediamine | 10 (T, N)                   |
|                                                   | 2-hydroxybenzaldehyde      | 5 (T)                       |
|                                                   | ZnO-NPs                    | 5 (N)                       |
|                                                   | MeOH                       | 10 (F, T)                   |
| 4. Technical setup                                | ball-mill                  | 2                           |
| 5. Temperature / Time                             | room temperature / < 1 h   | 0                           |
| 6. Work-up and purification                       |                            |                             |
|                                                   | adding solvent             | 0                           |
|                                                   | simple filtration          | 0                           |

<sup>a</sup>The reaction was performed on a 10 mmol scale. <sup>b</sup>The total of all penalties was 35 that produced an eco-scale score of 65 (100-35), which is indicative of an acceptable synthesis.

**Table S4.** Calculation of the E-factor and mass intensity for the reaction of *o*-phenylenediamine with 2-hydroxybenzaldehyde.

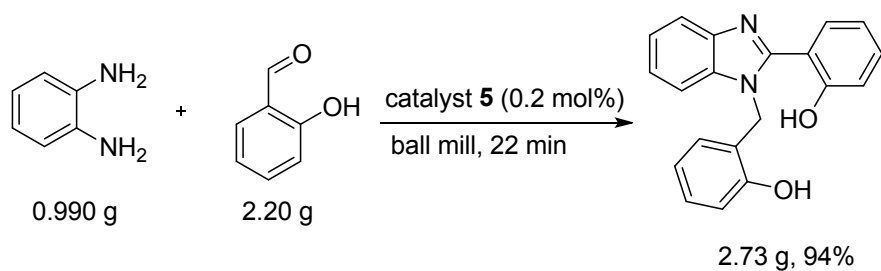

Total amount of reactants: 0.990 g + 2.20 g + 0.013 = 3.20 g

Amount of final product: 2.73 g

Amount of waste: (3.20 g - 2.73 g) = 0.47 g

E-Factor = amount of waste/amount of product = 0.47/2.73 = 0.17

Mass intensity (MI) = 1.17

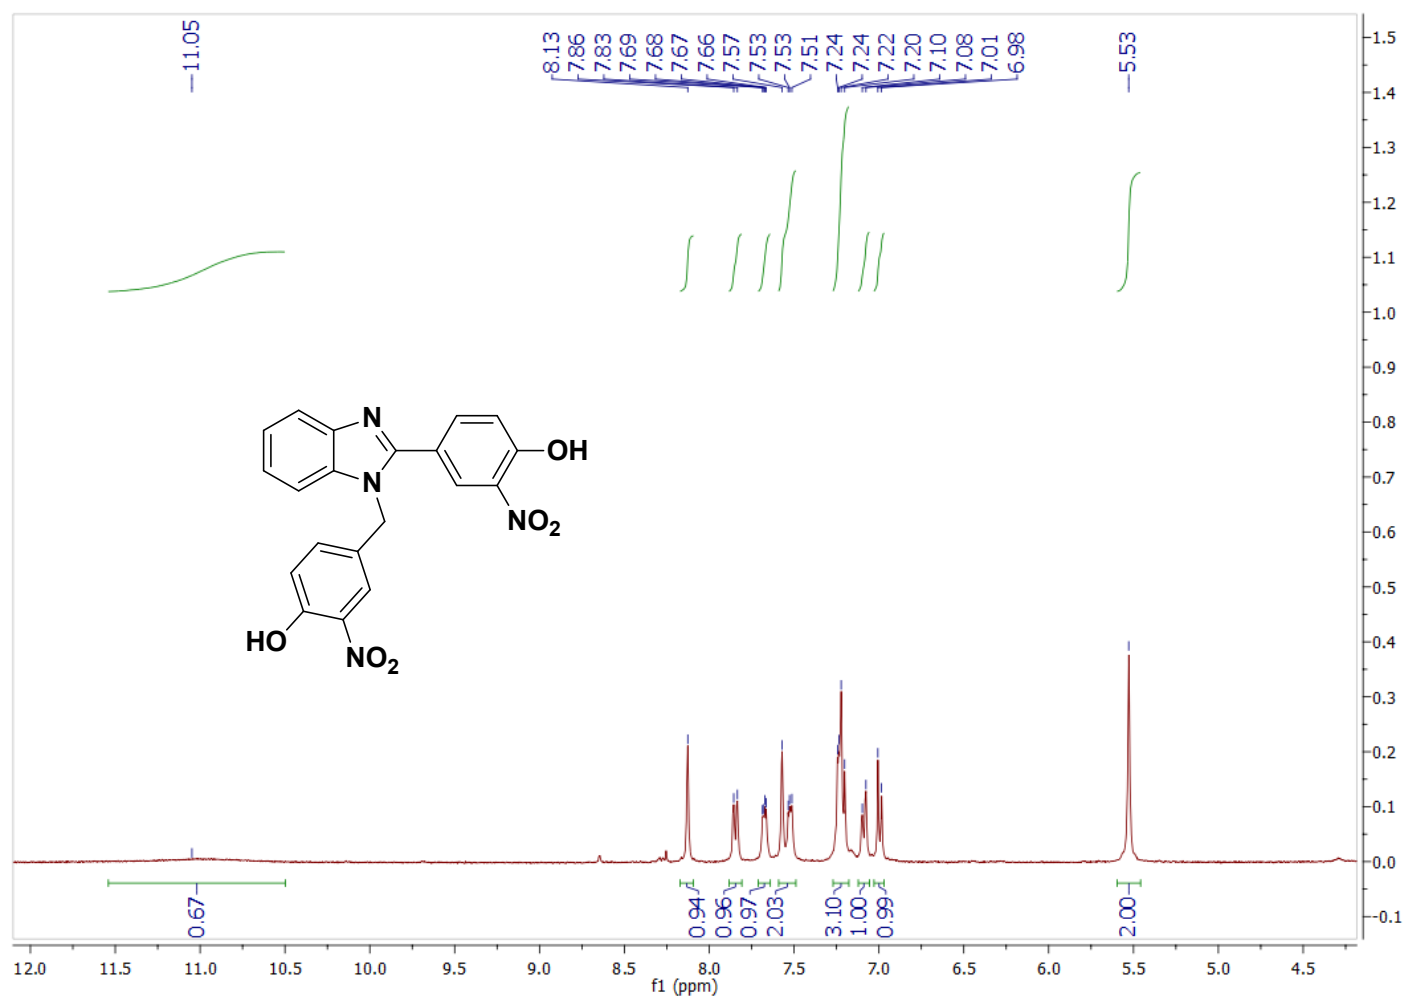

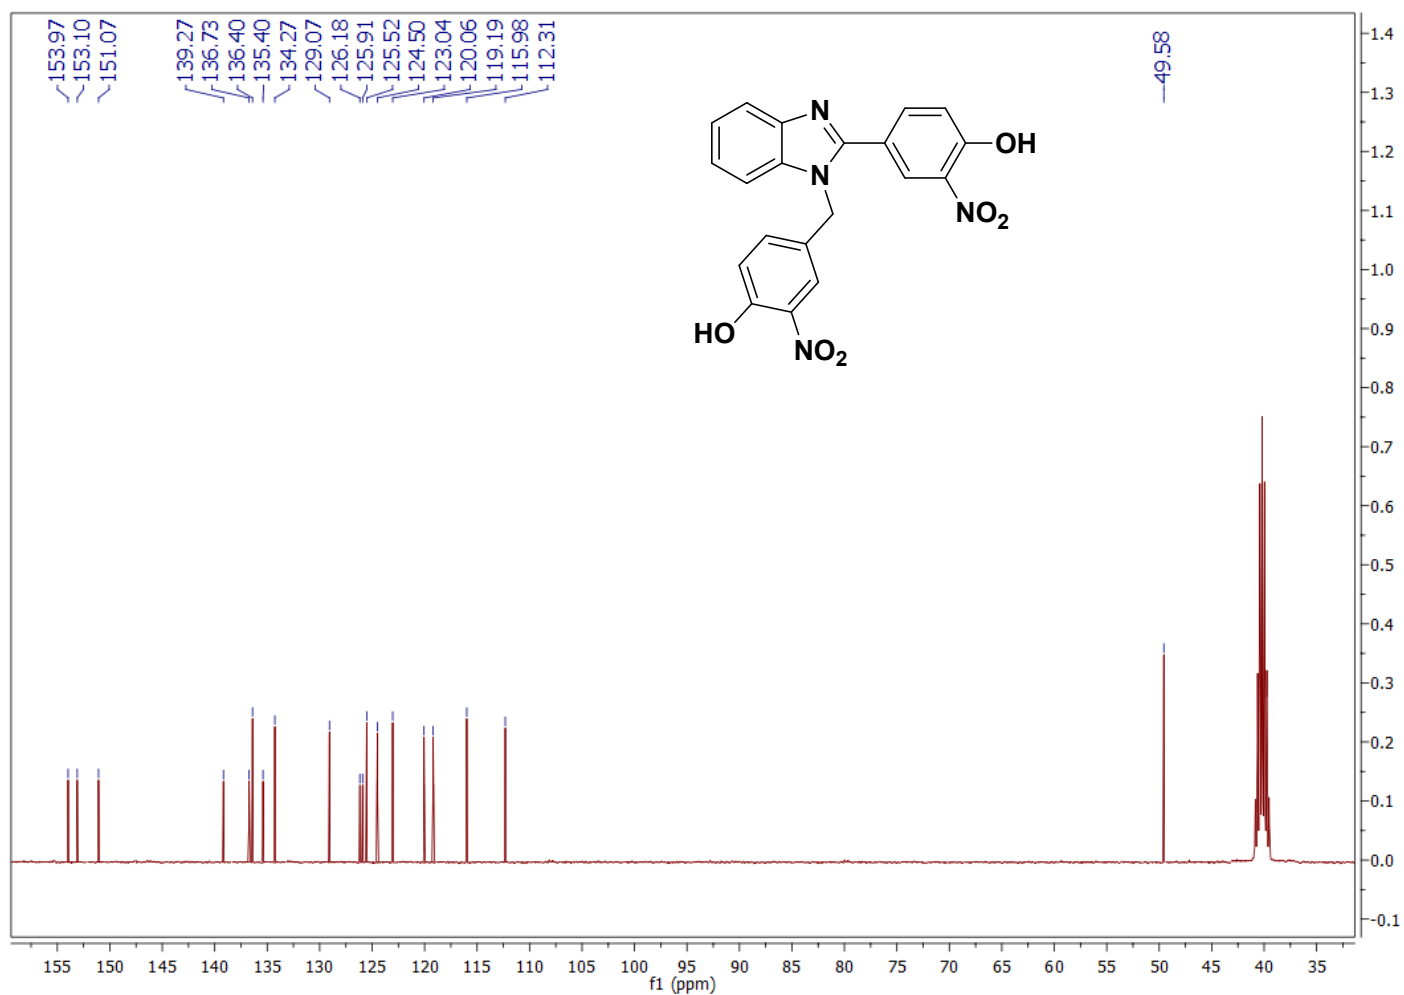

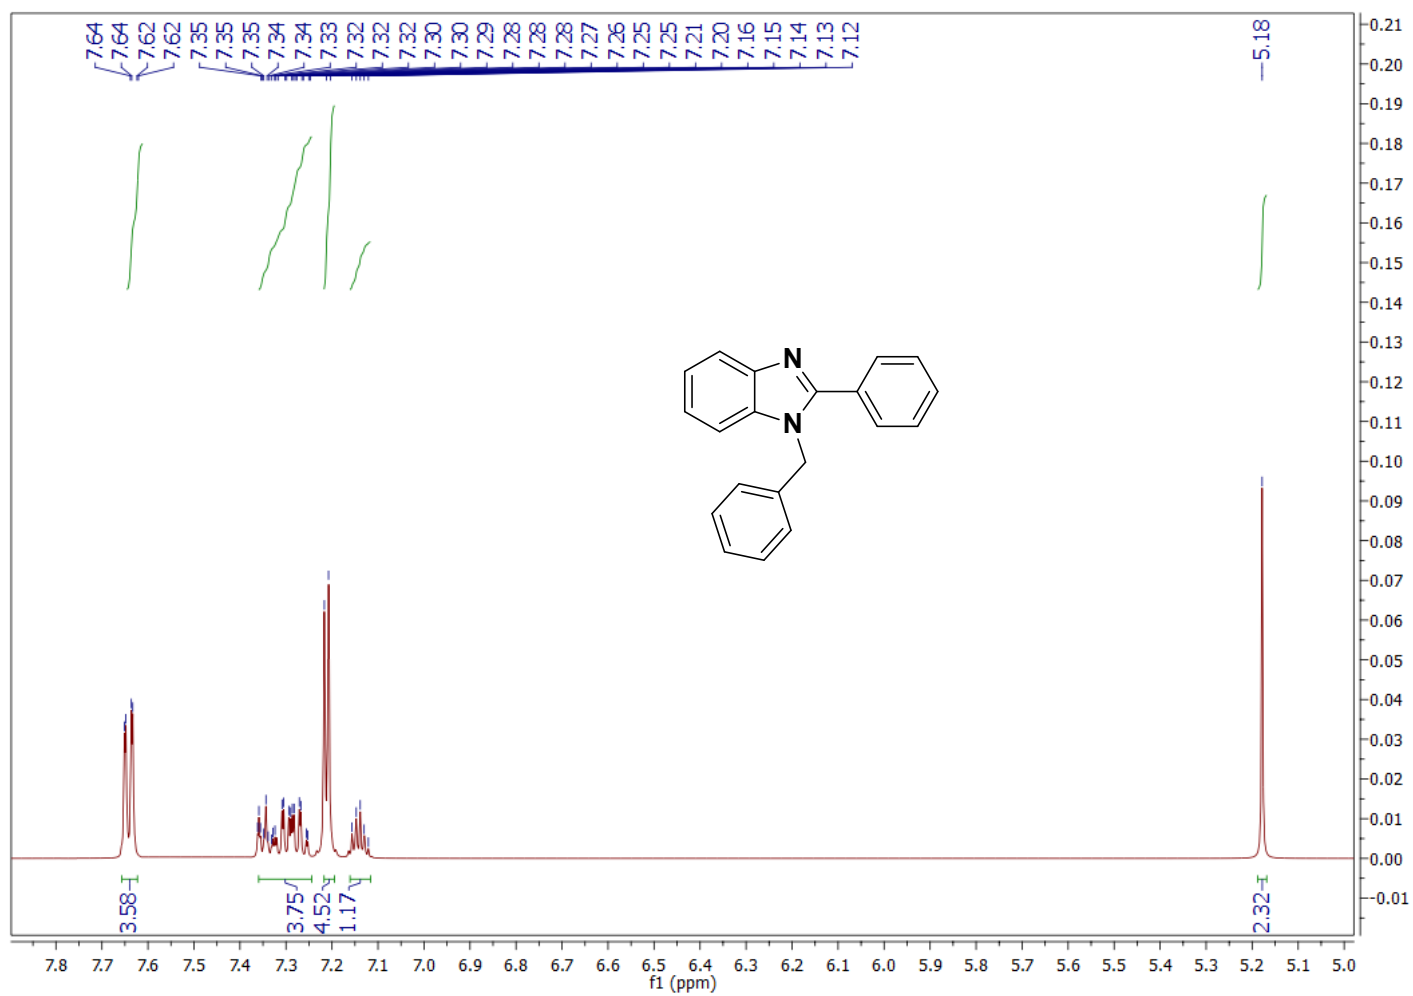

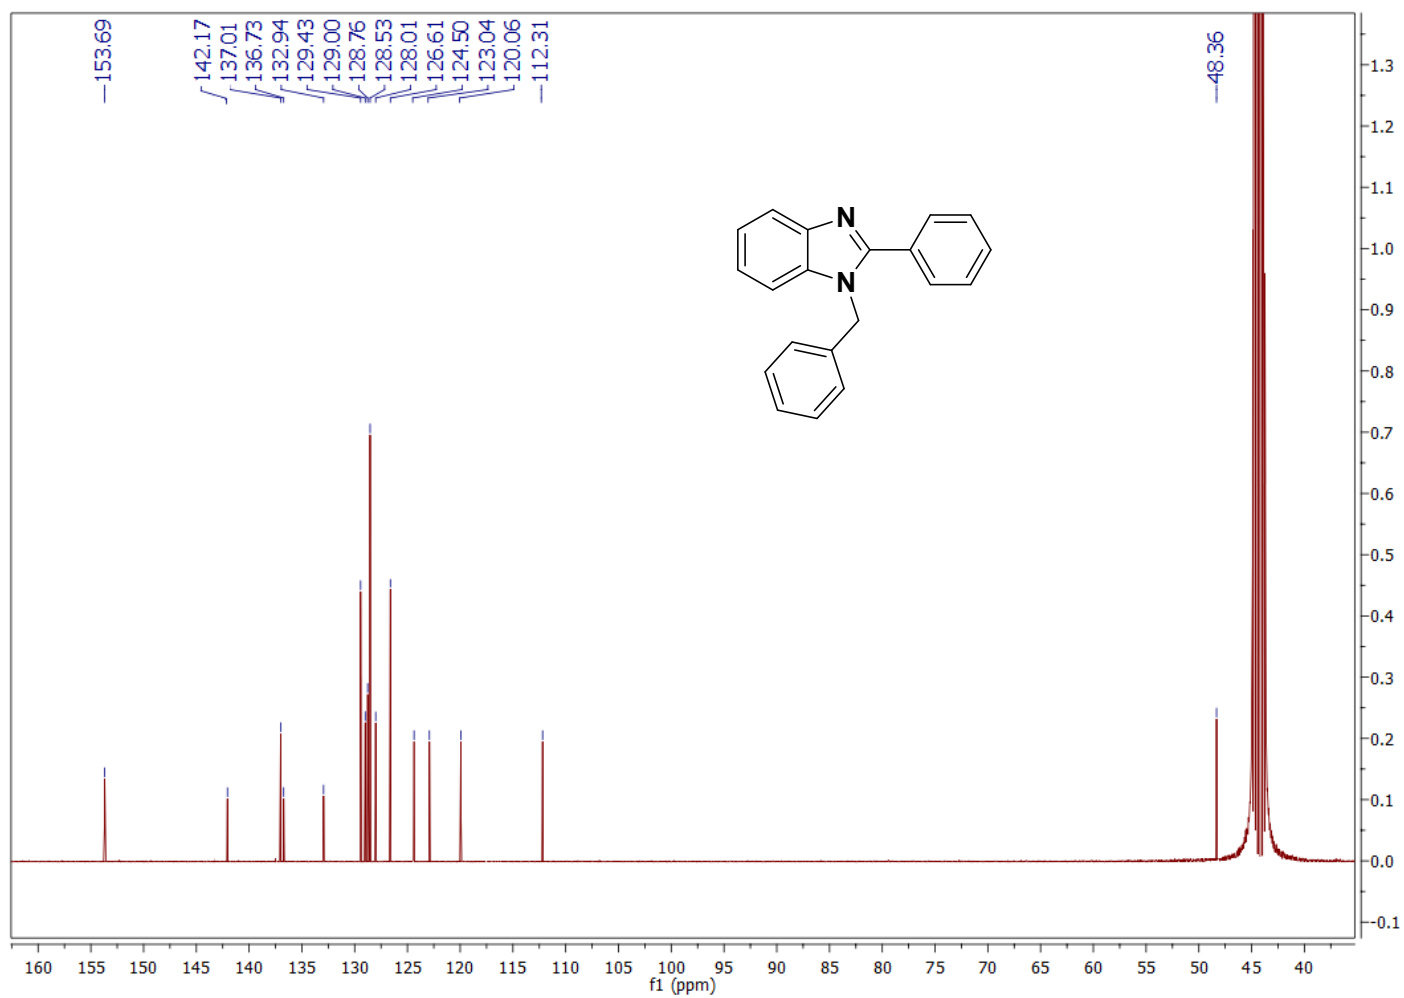

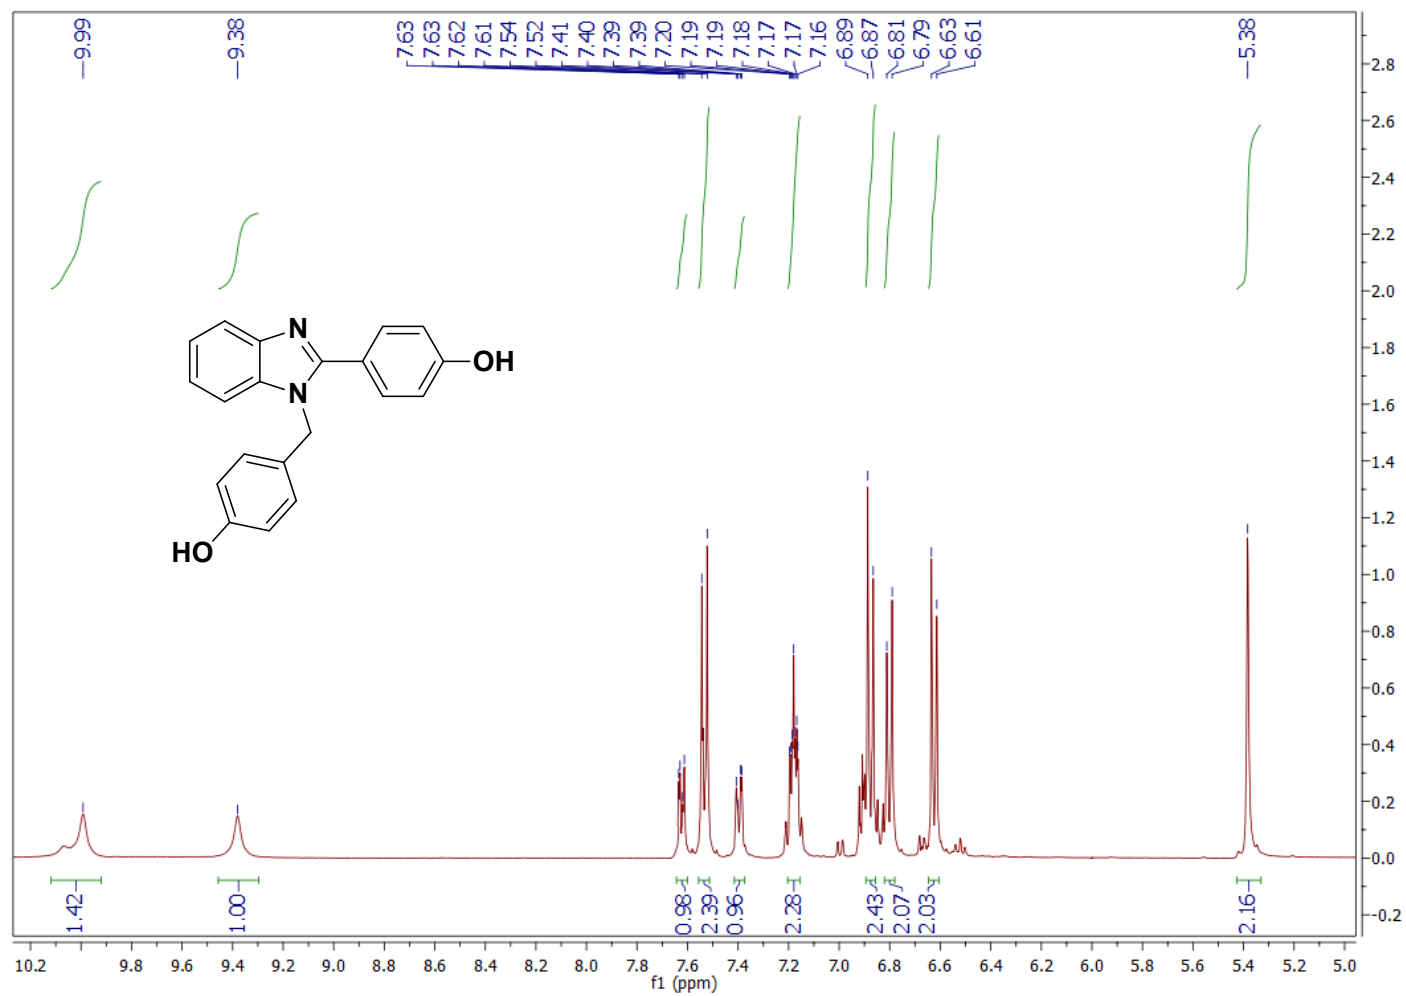

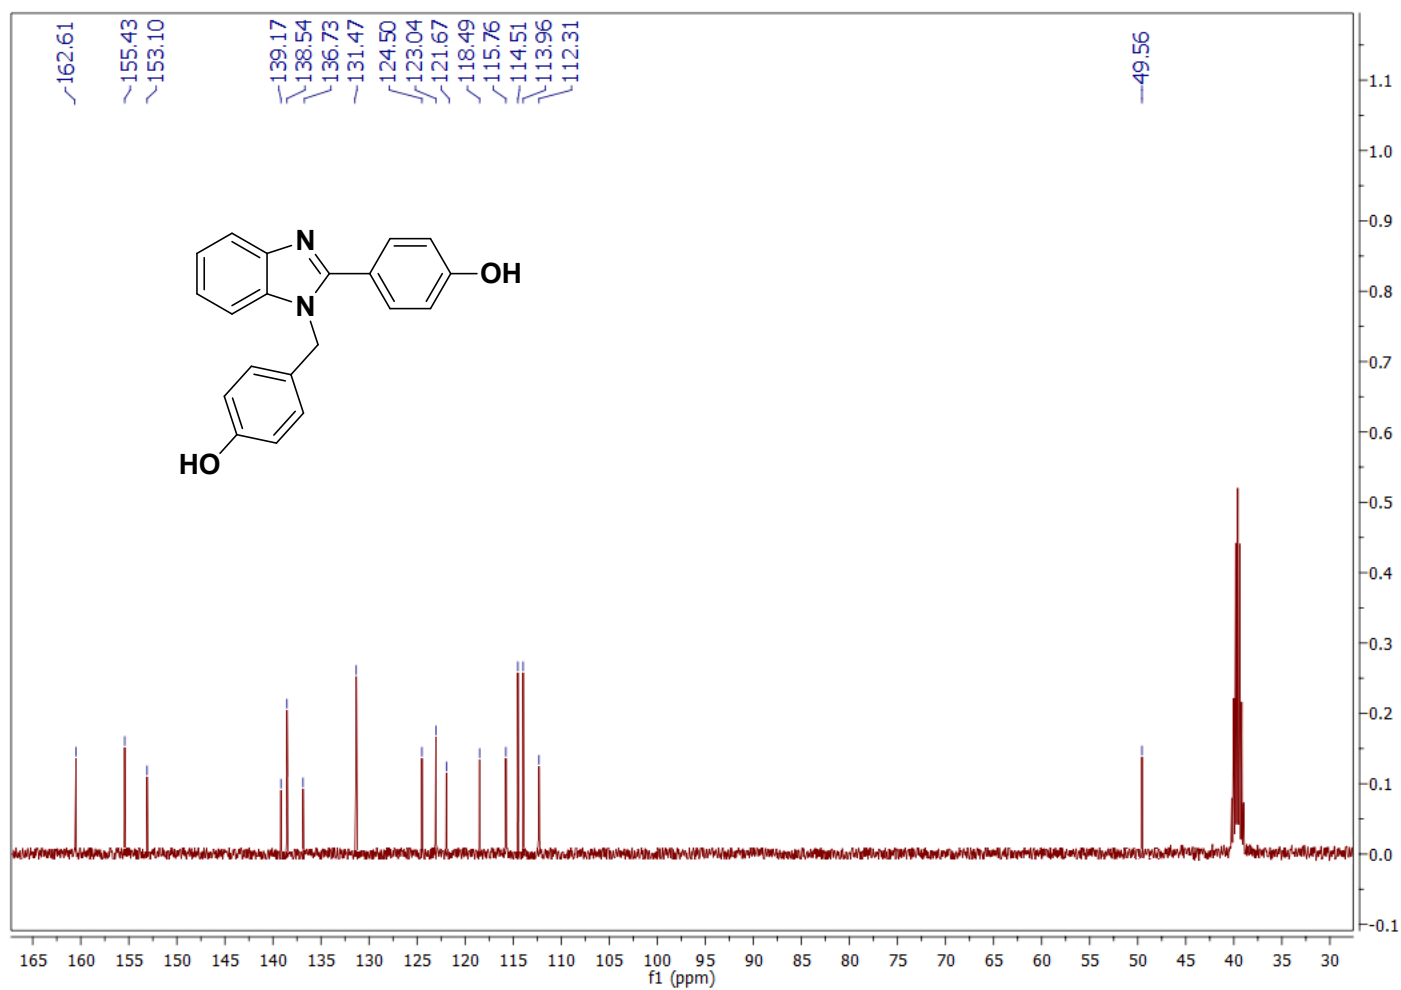

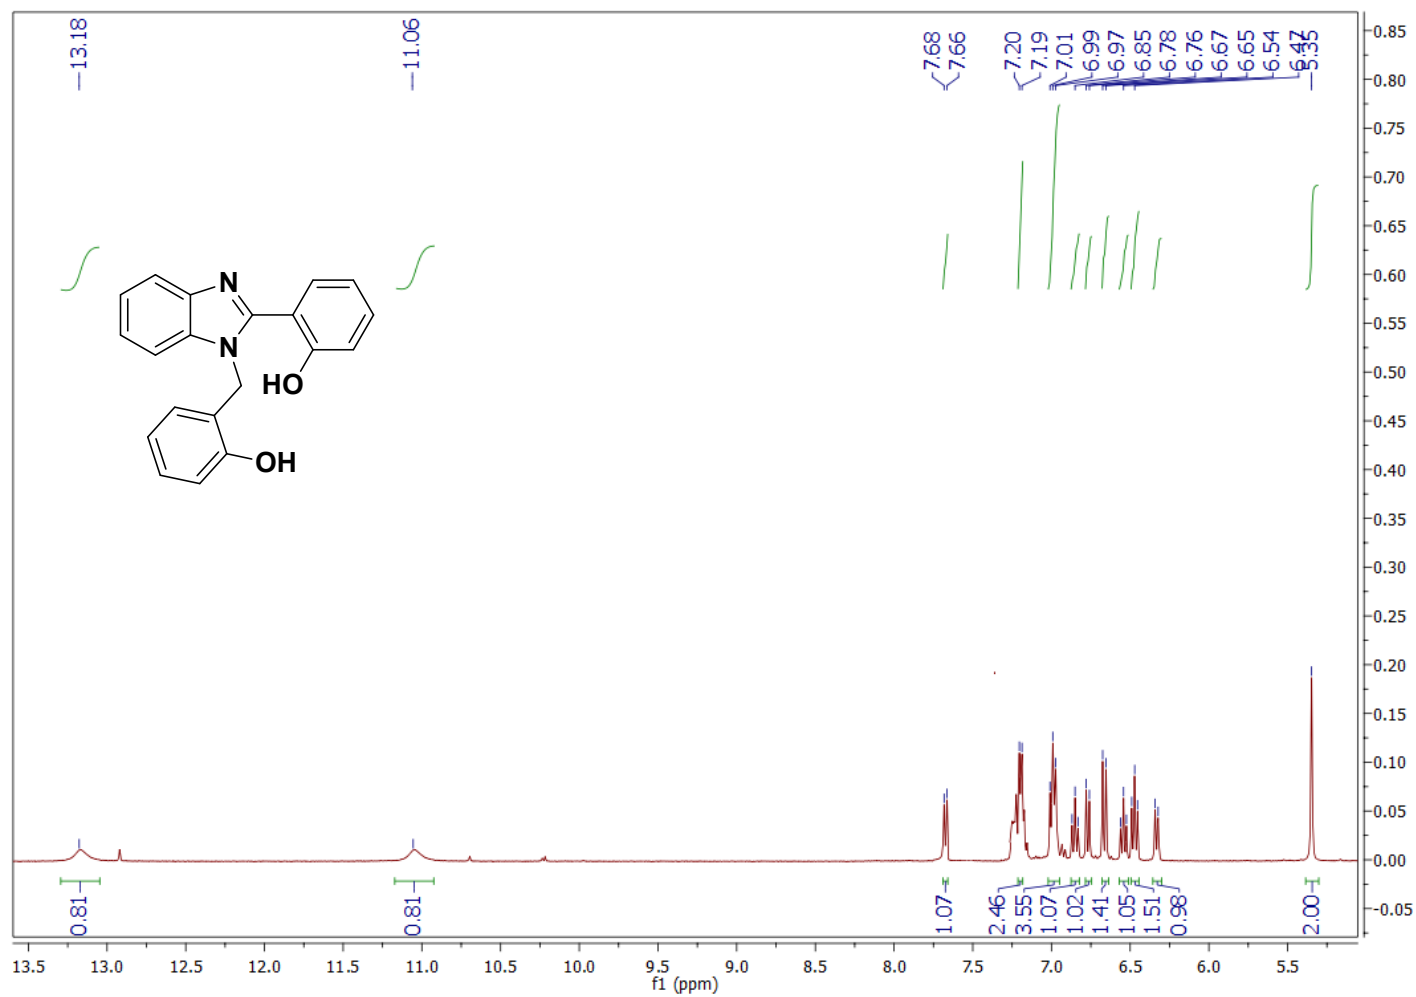

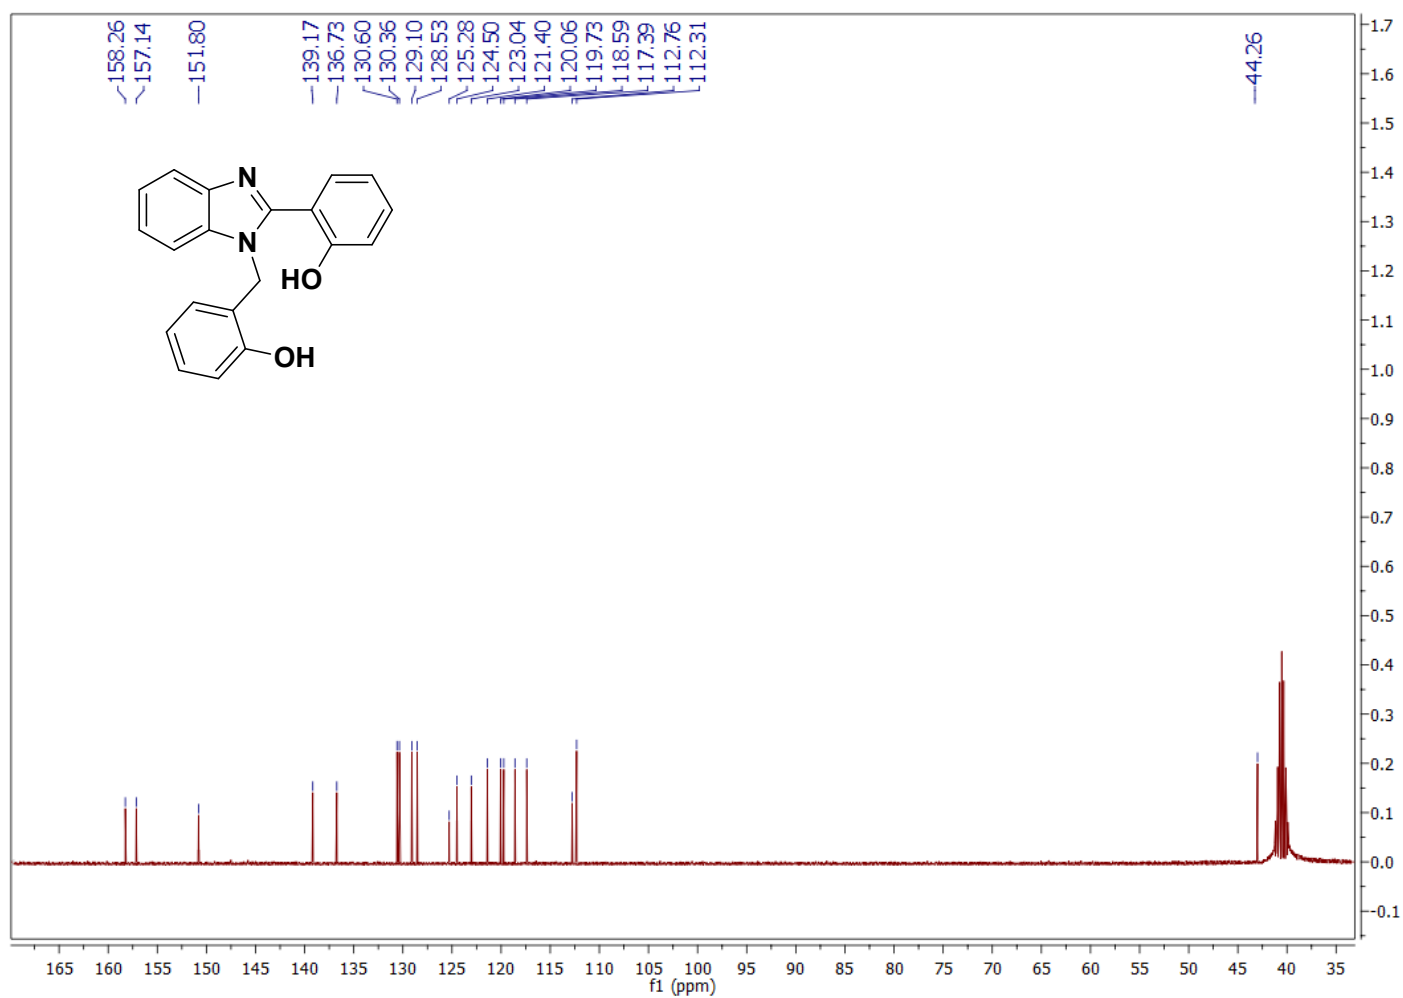

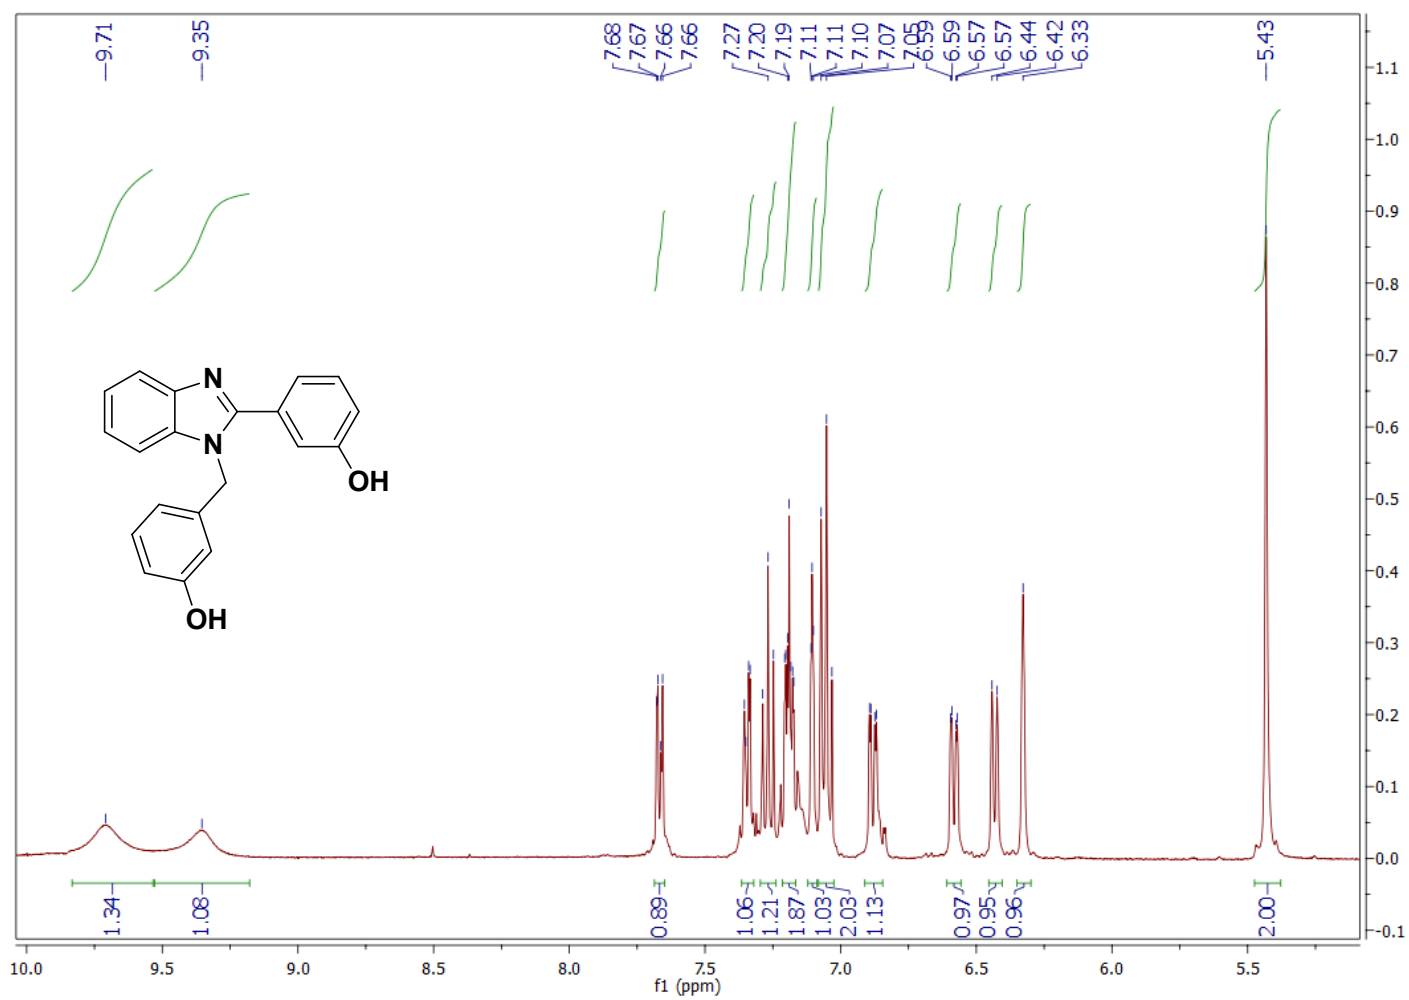

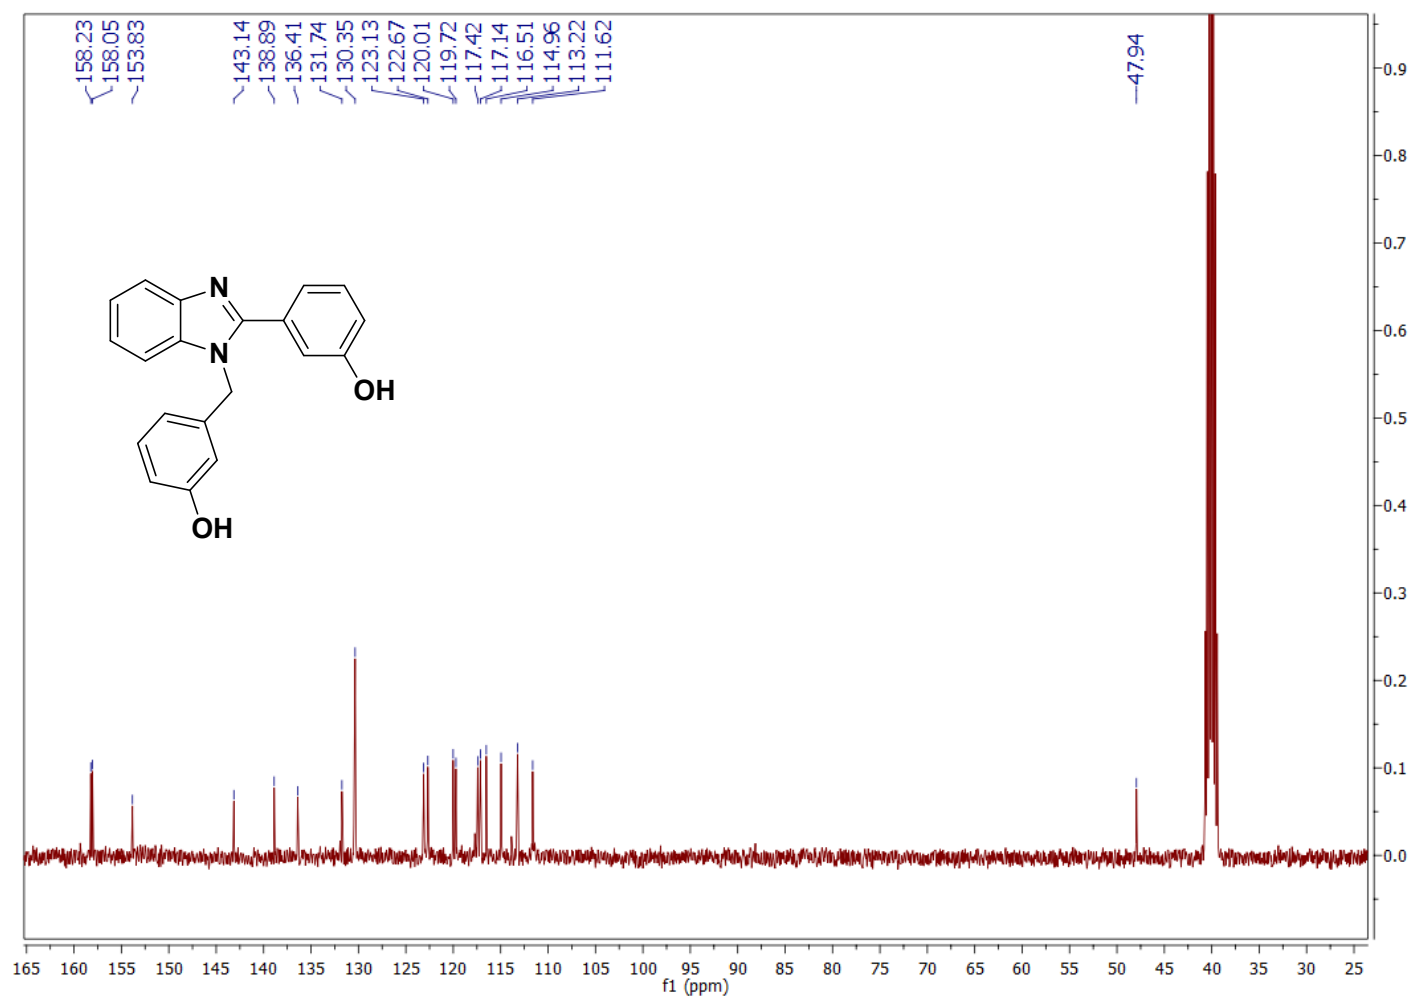

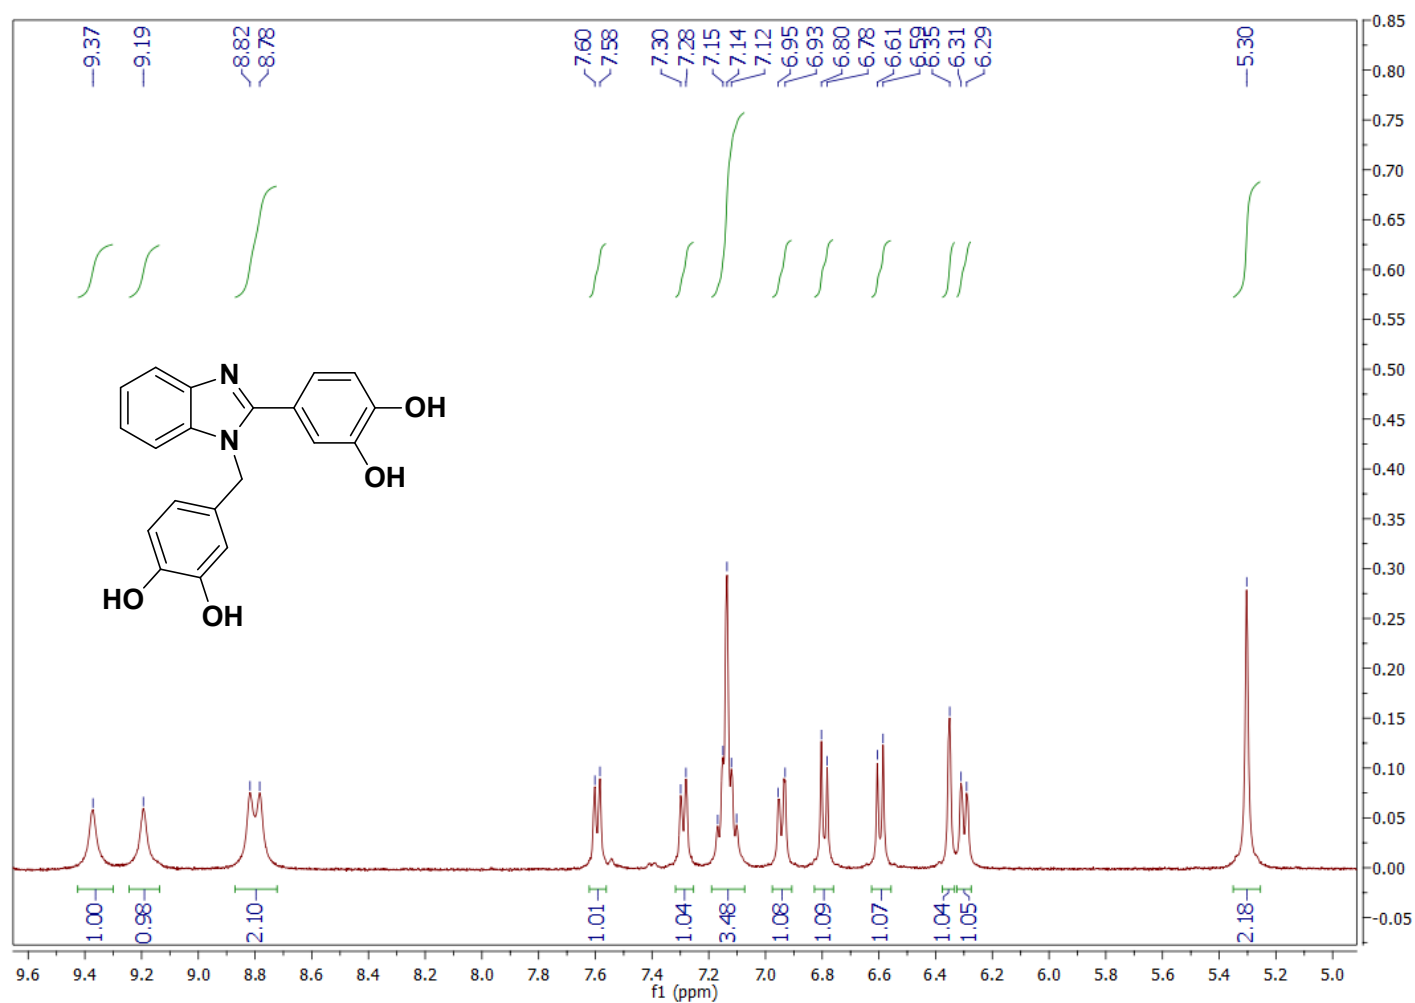

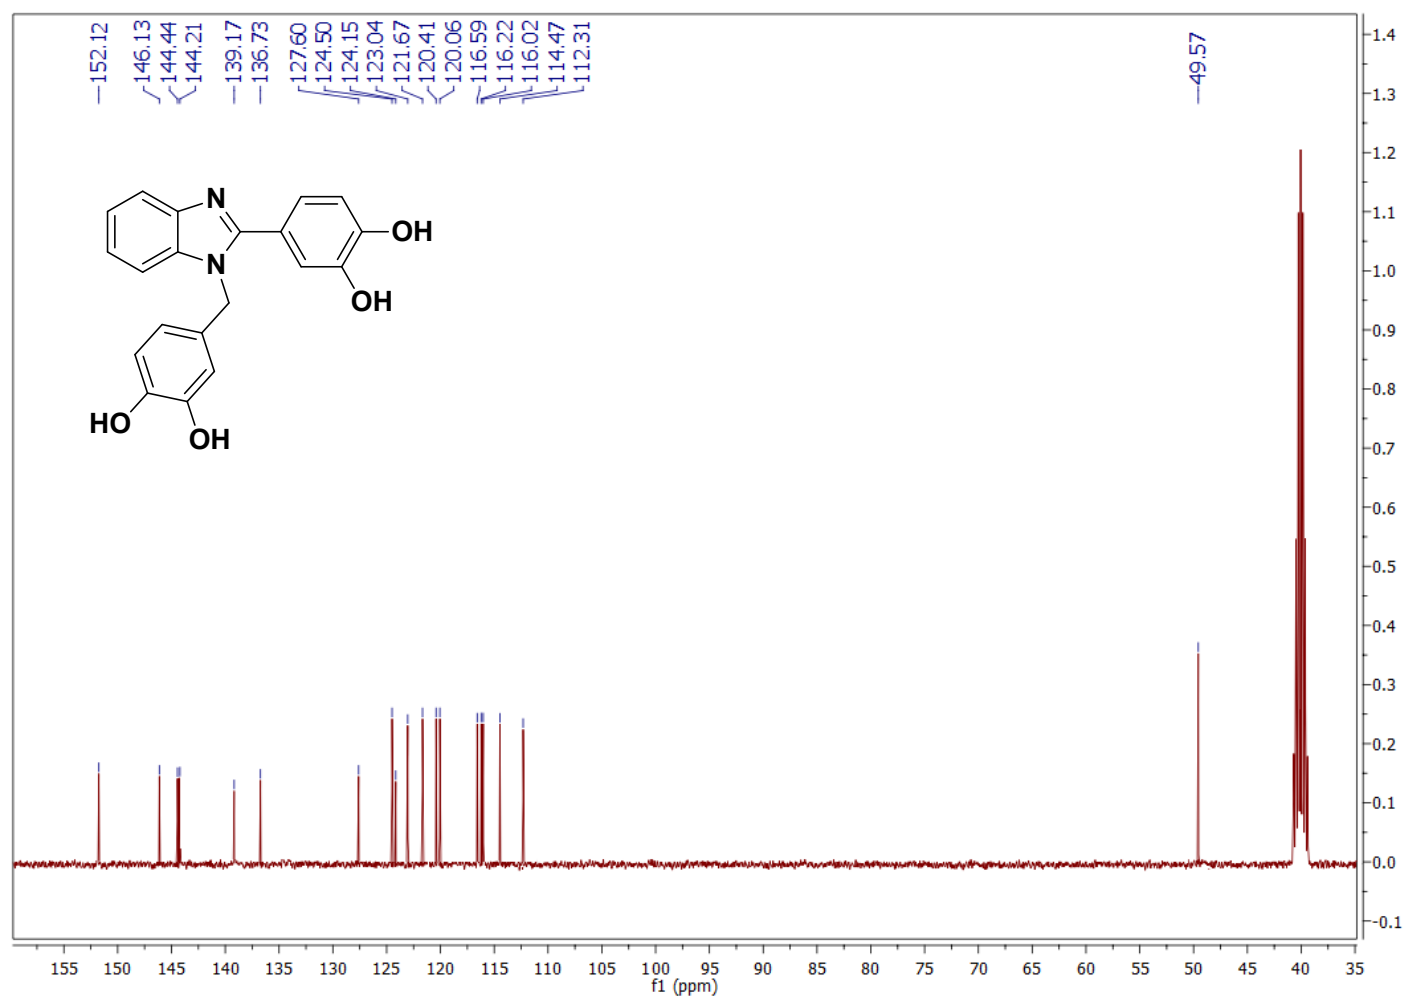

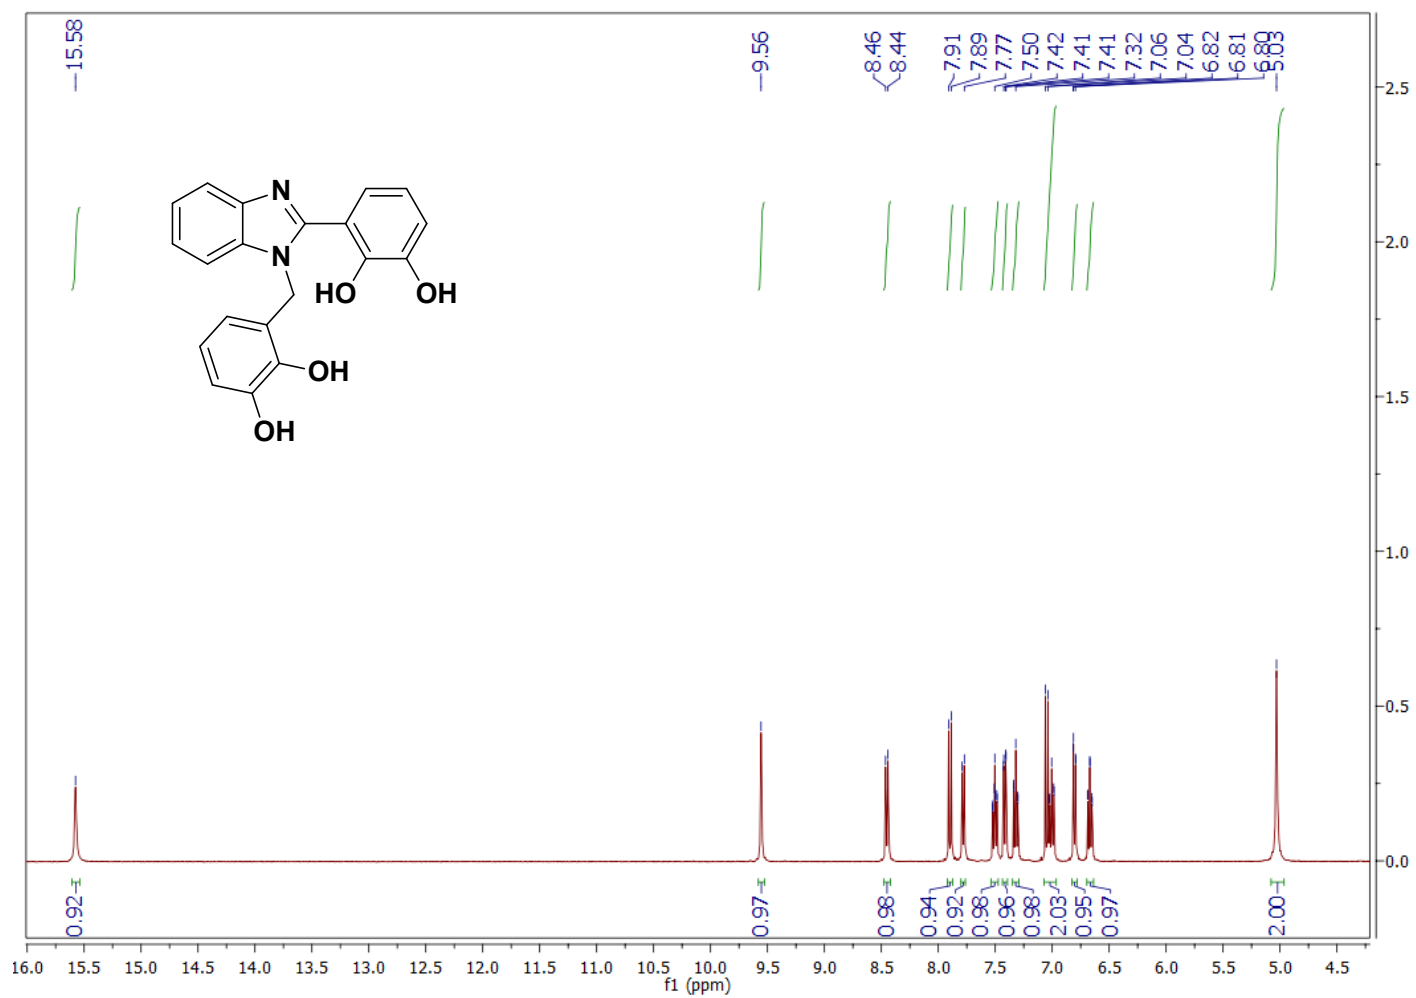

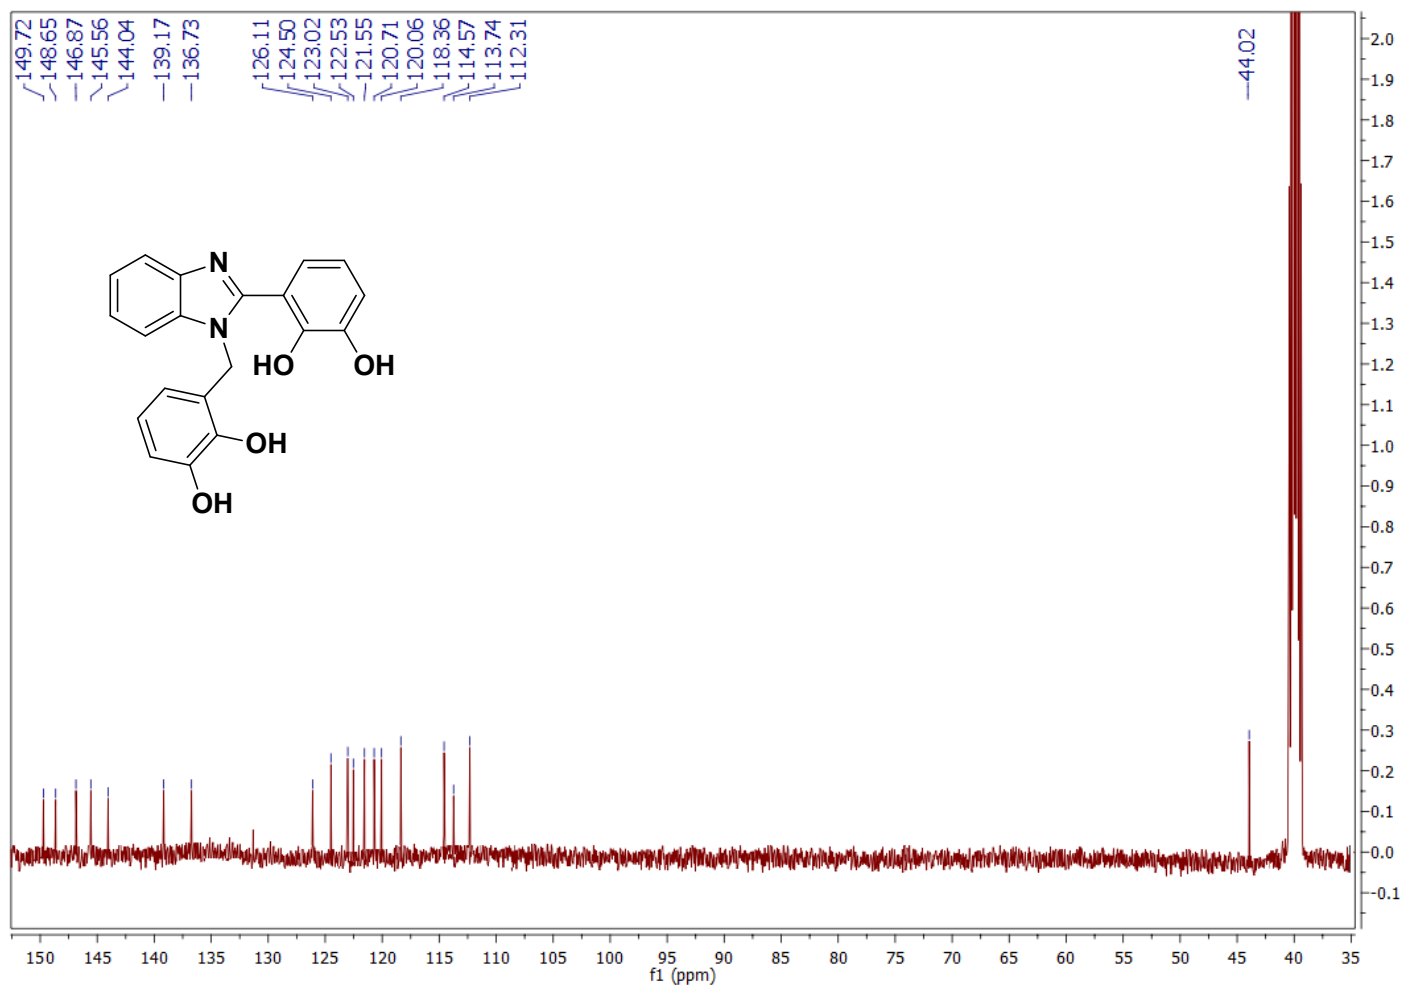

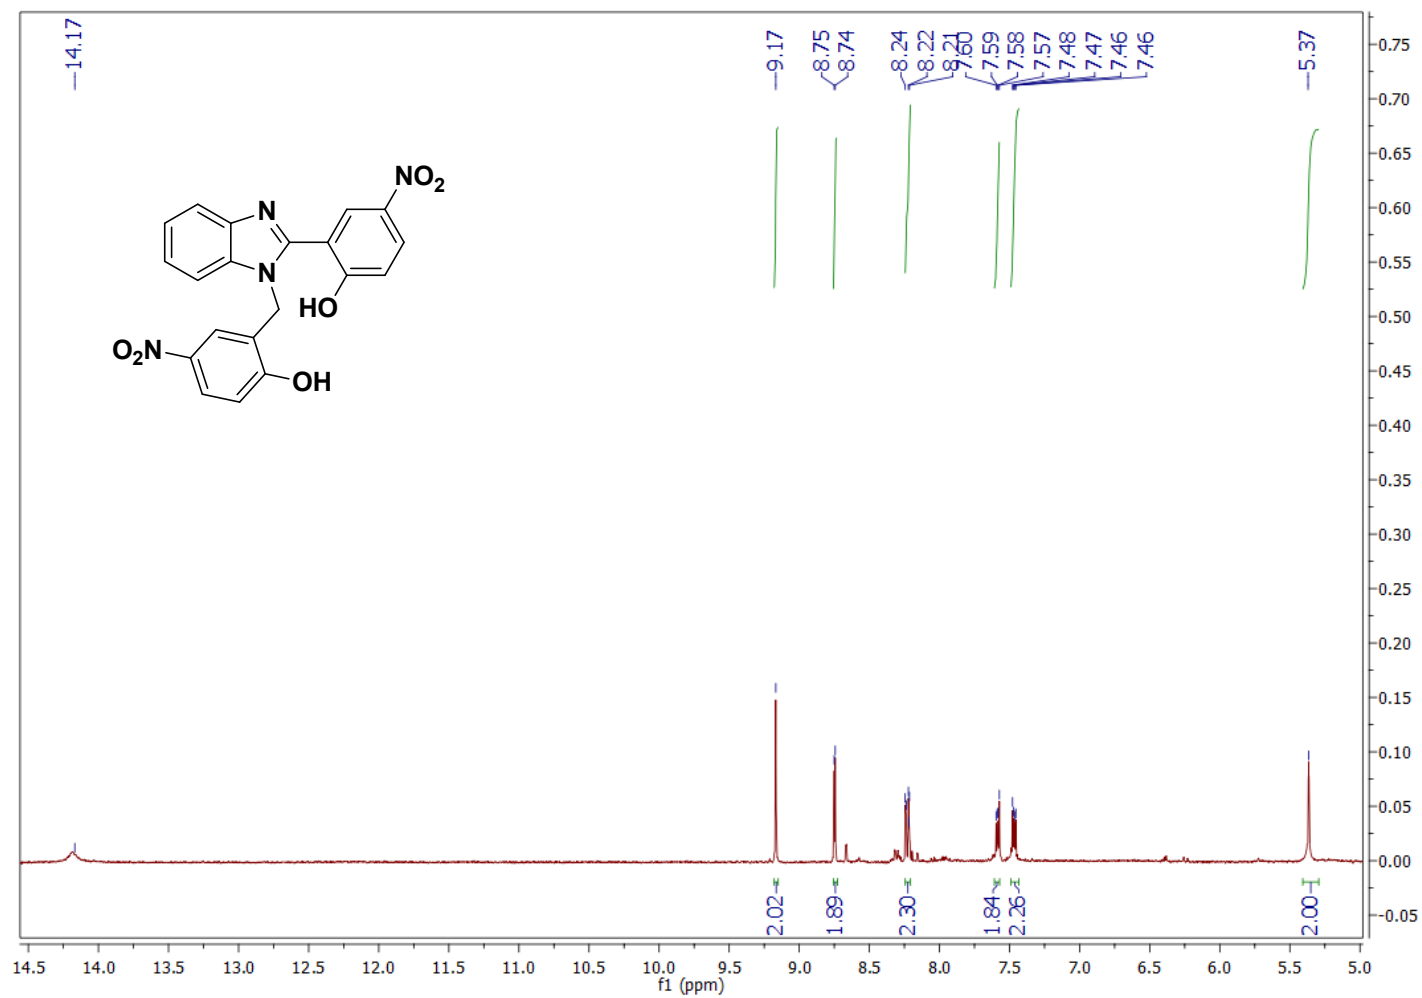

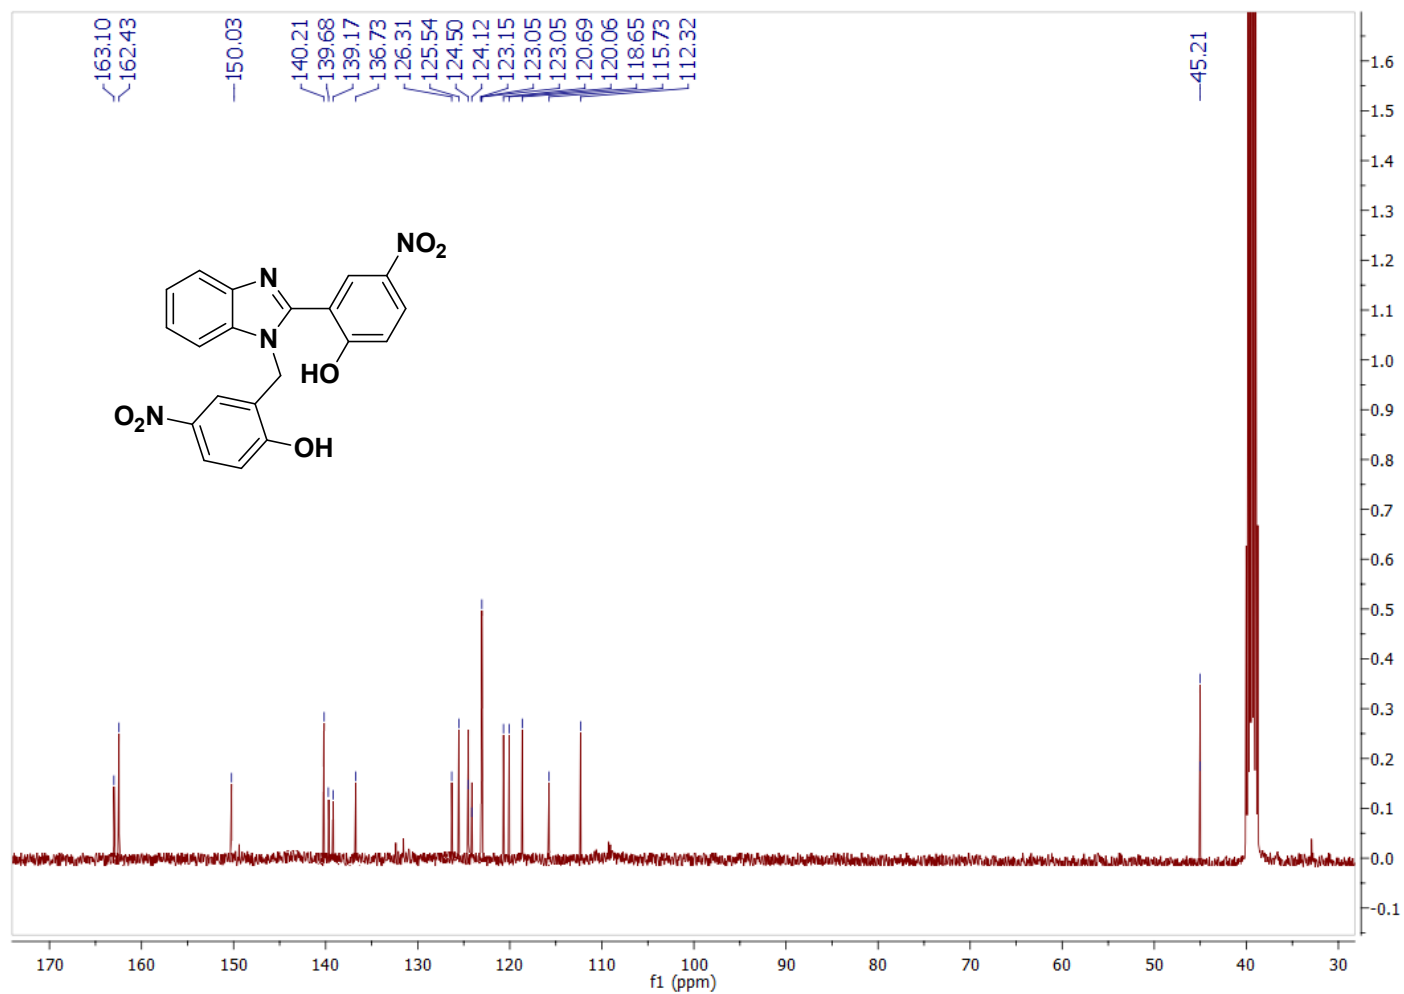

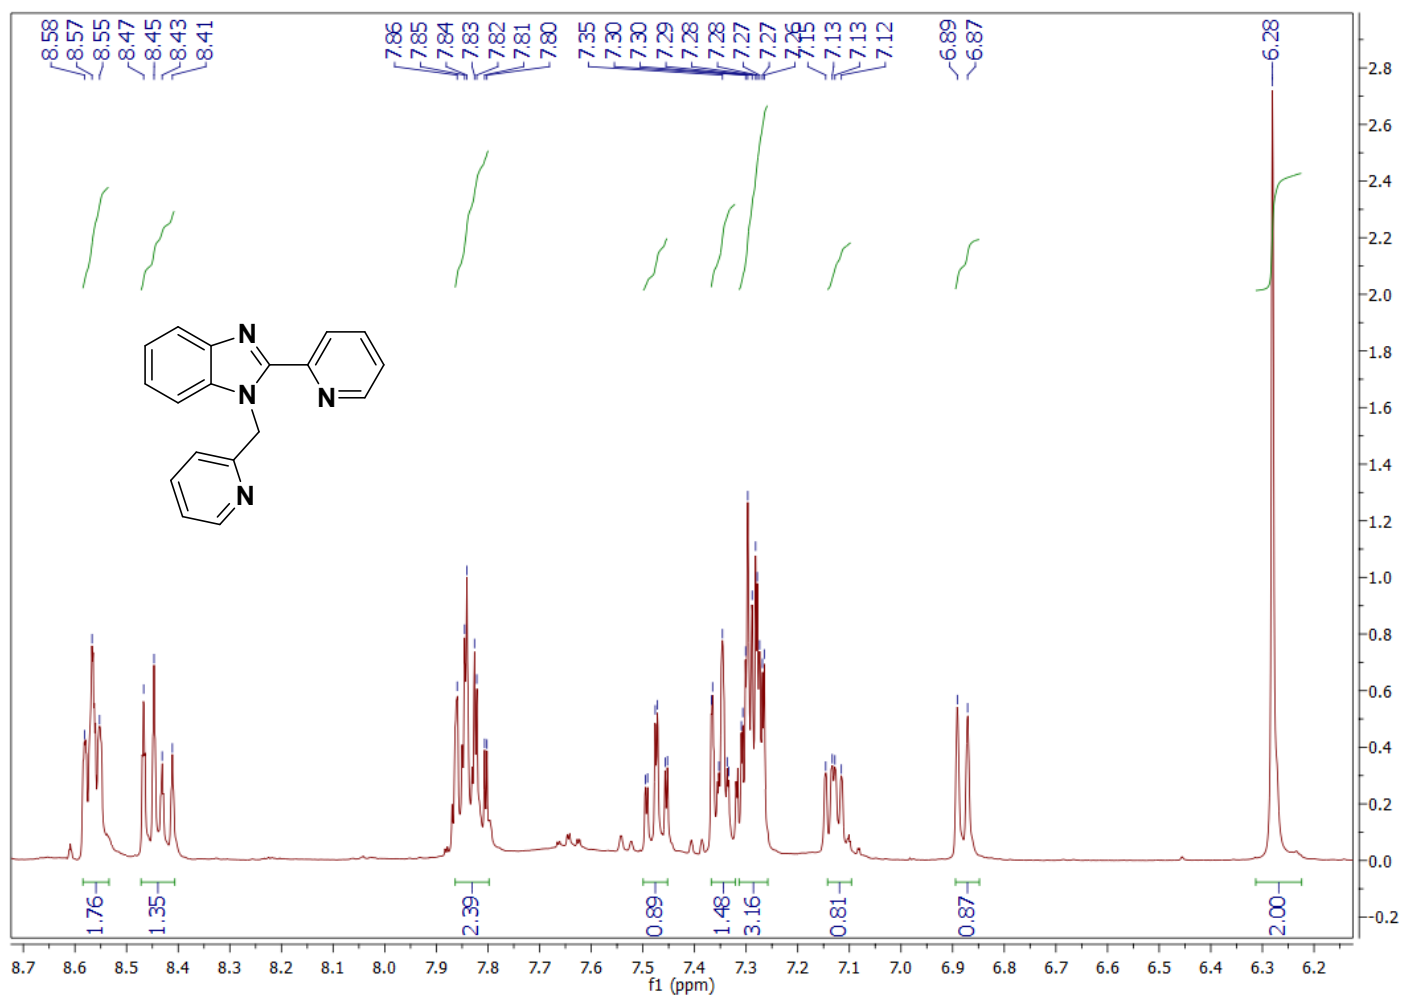

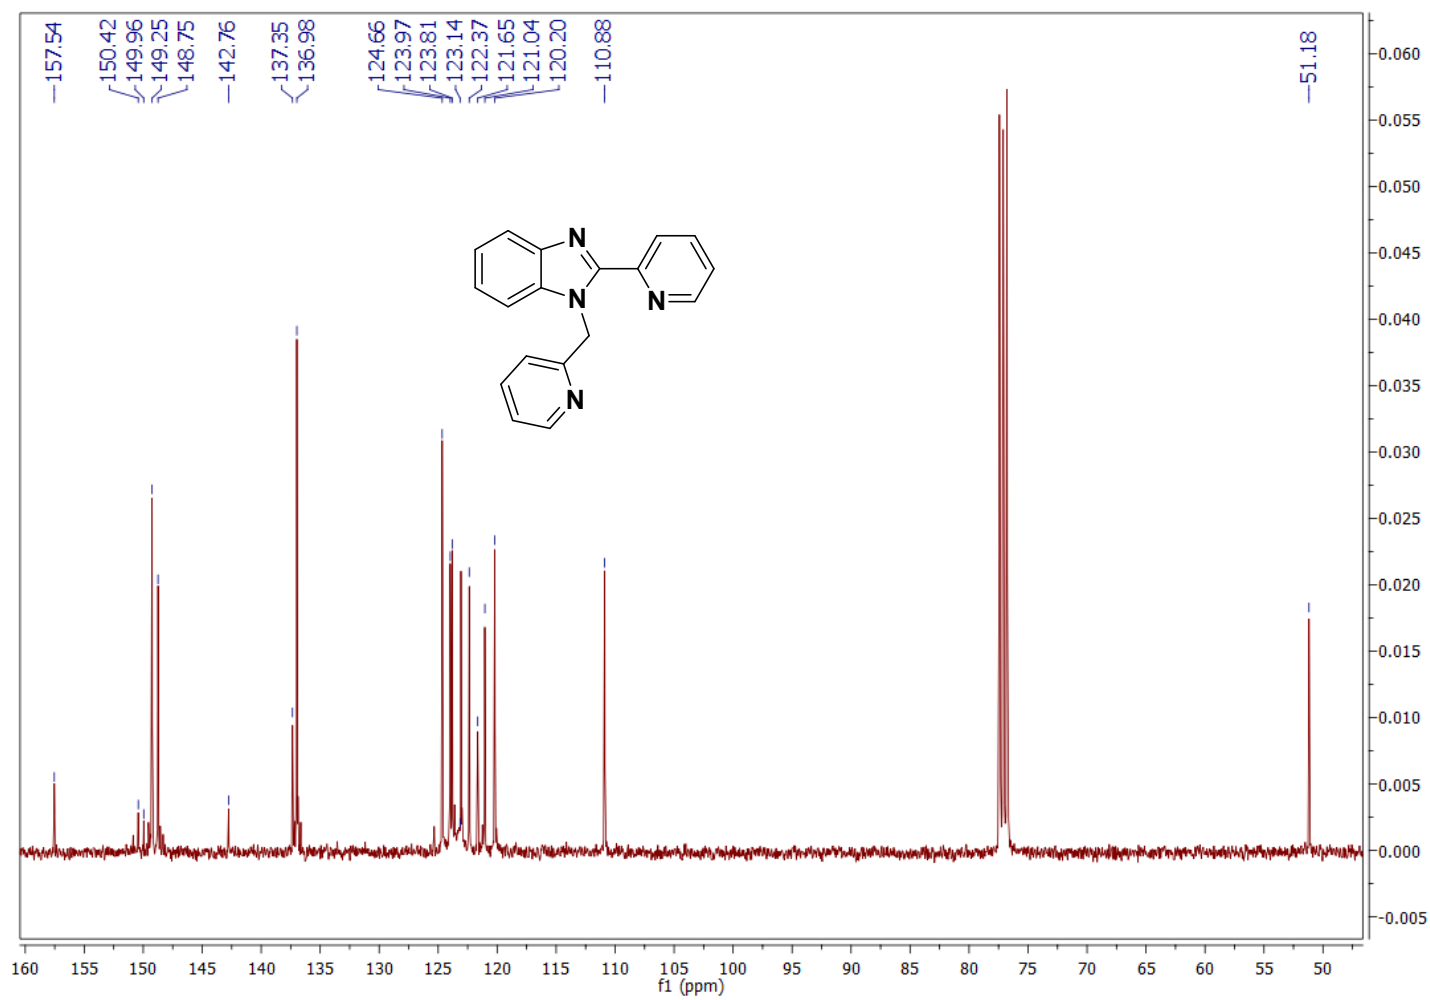

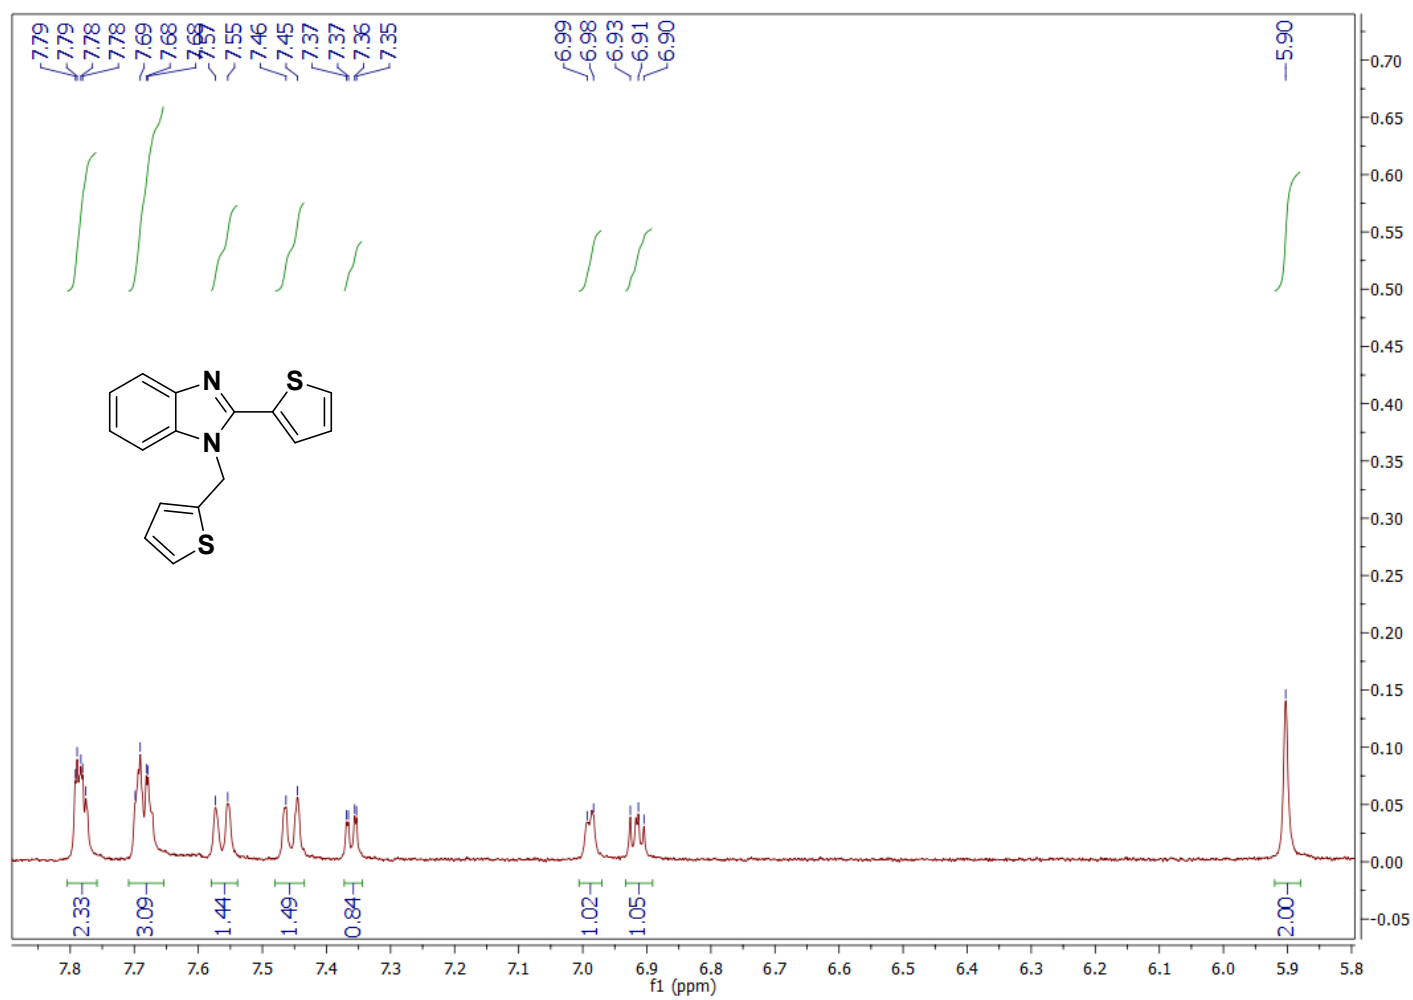

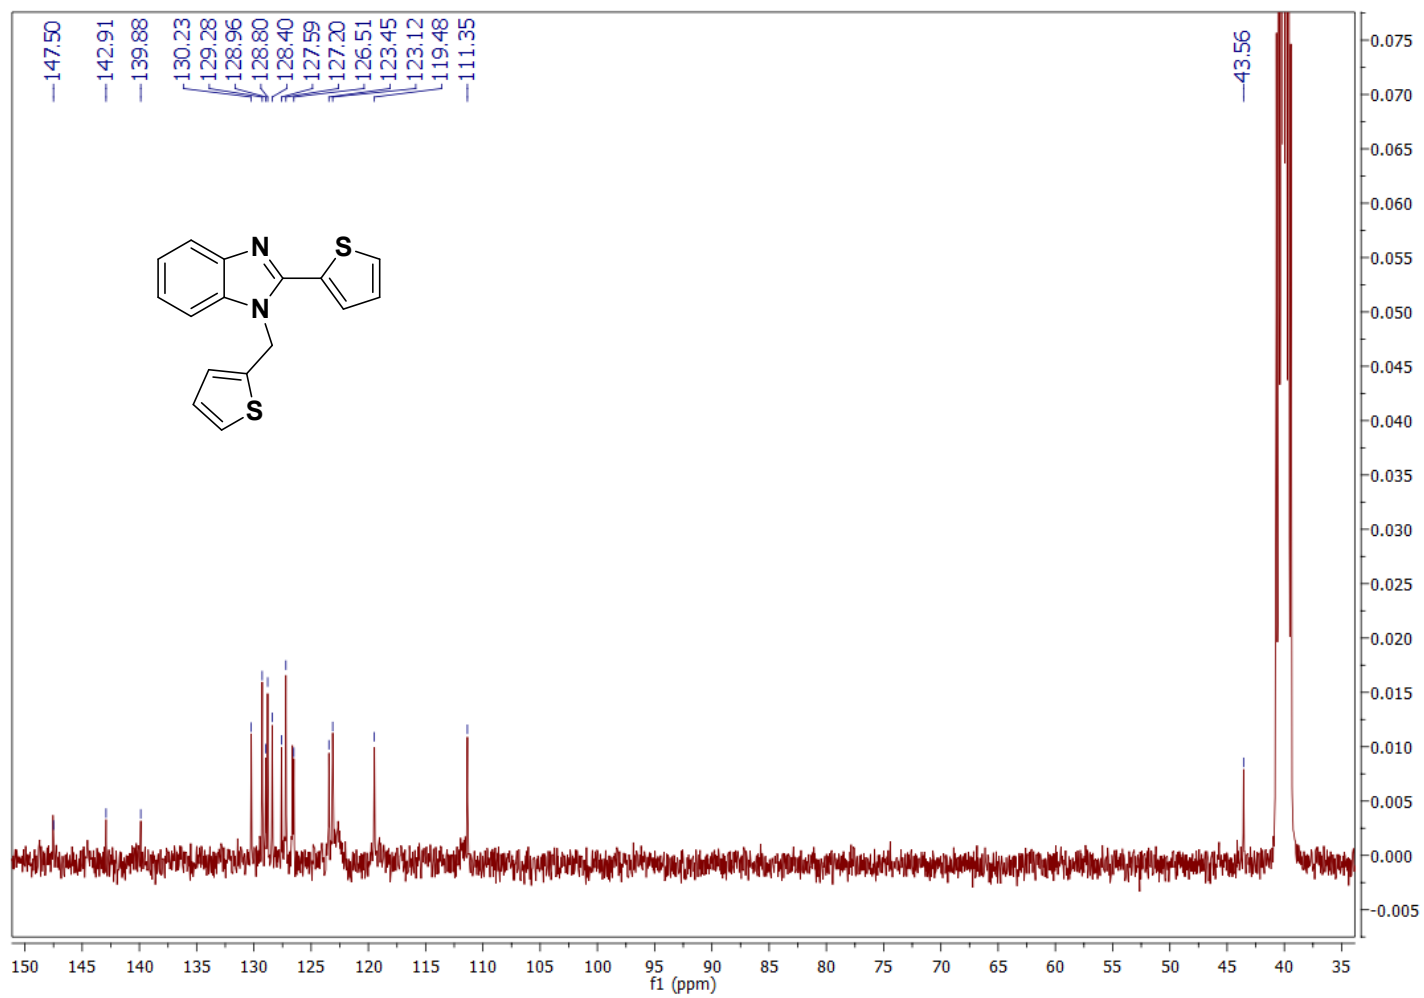

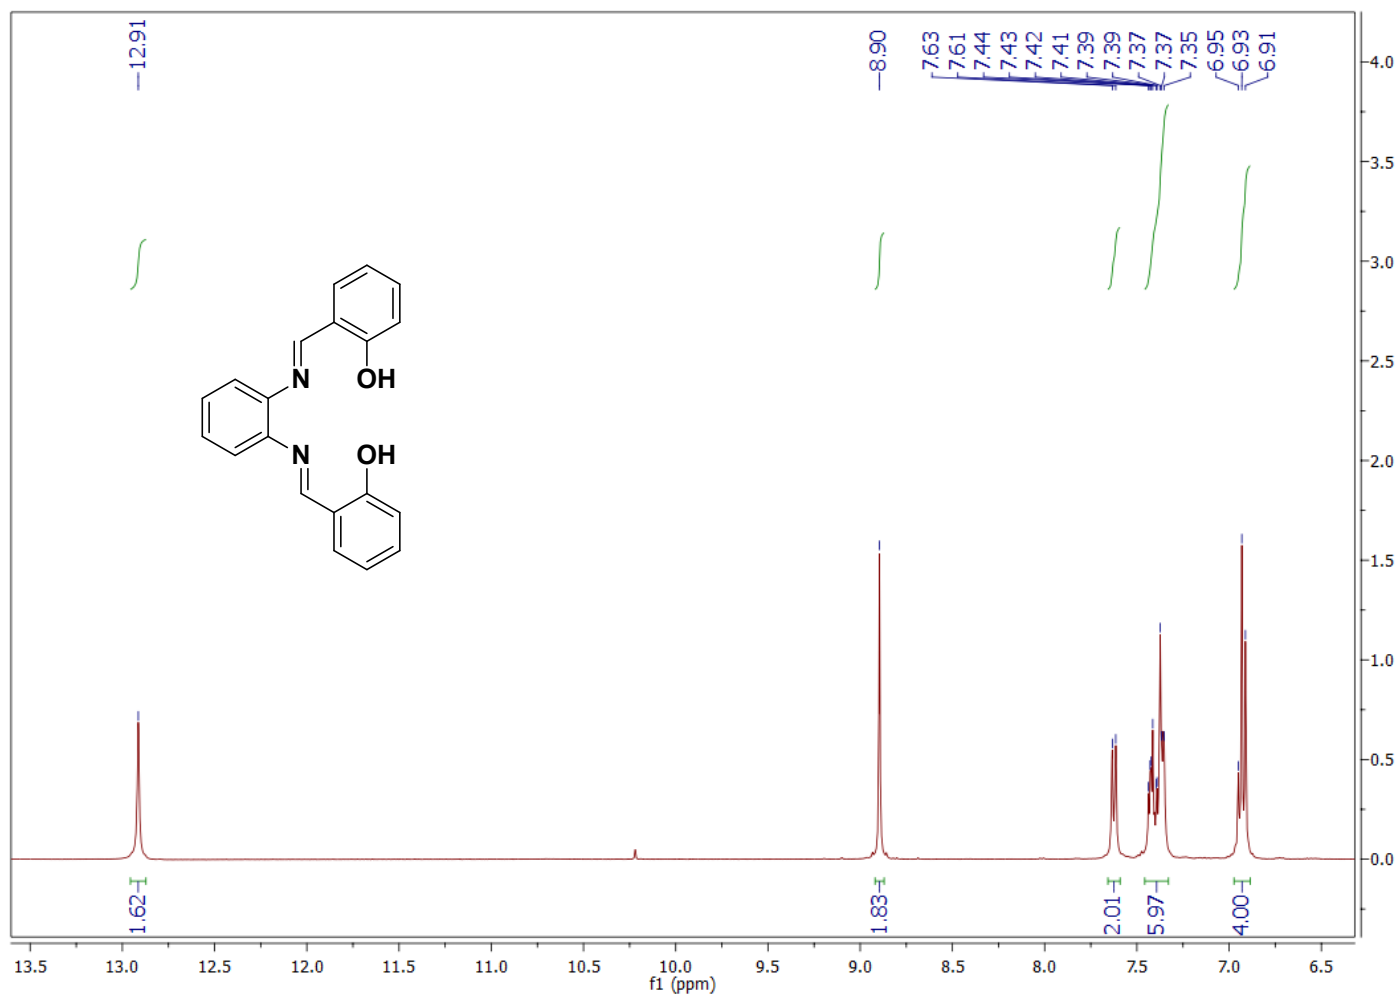

Supplement: c5gc00536a1.pdf [file c5gc00536a1.pdf]
